# Supplementary material for: Modulation of alternative splicing by long-range RNA structures in Drosophila
Source: PubMed Central journal article supplement — Nucleic Acids Res. 2009 May 22;37(14):4533–44. doi: 10.1093/nar/gkp407 (PMC2724269; doi:10.1093/nar/gkp407), 2009-05-22
Supplement: gkp407_1.pdf [file gkp407_1.pdf]

Supplementary Table 1: (continued)

|     |                |                                                     |       |      |    |                |       |                      |
|-----|----------------|-----------------------------------------------------|-------|------|----|----------------|-------|----------------------|
| 104 | Syb            | Lumen formation, open tracheal system               | 578   | 27.7 | 15 | ●●●●●●●●●○●○●○ | A     | $6.3 \cdot 10^{-13}$ |
| 105 | Ada2b          | DNA binding, DNA-dependent, transcription           | 287   | 13.4 | 9  | ●●●●●○●○●●●○●○ | A     | $9.1 \cdot 10^{-13}$ |
| 106 | CG7191         | Protein binding                                     | 395   | 16.7 | 10 | ●●●●●●●●●○●○   |       | $1 \cdot 10^{-12}$   |
| 107 | CG32720        | Unkown                                              | 644   | 17.2 | 10 | ●●●●●○●●●○●○   |       | $1 \cdot 10^{-12}$   |
| 108 | heph           | RNA binding, mRNA processing, protein binding       | 7505  | 21.0 | 11 | ●●●●●○●○●○●○●● |       | $1 \cdot 10^{-12}$   |
| 109 | wupA           | Actin binding, protein binding, heart development   | 5428  | 11.8 | 9  | ●●●●●●●●●○●○   | MES,D | $1.3 \cdot 10^{-12}$ |
| 110 | cutlet         | ATP binding, proteolysis, hydrolase activity        | 121   | 18.4 | 11 | ●●●●●●●●●○●○   |       | $1.8 \cdot 10^{-12}$ |
| 111 | CG15376        | Protein binding                                     | 1304  | 28.6 | 14 | ●●●●●●●●●○     |       | $1.8 \cdot 10^{-12}$ |
| 112 | shot           | Axonogenesis, branch fusion, actin binding          | 74    | 20.3 | 11 | ●●●●●●●●●○     |       | $1.9 \cdot 10^{-12}$ |
| 113 | Usp7           | Ubiquitin cycle, protein binding                    | 169   | 14.5 | 9  | ●●●●●●●●●      |       | $2.3 \cdot 10^{-12}$ |
| 114 | CG34394        | Unkown                                              | 1358  | 13.1 | 9  | ●●●●●●○●○●●●   | ES    | $2.6 \cdot 10^{-12}$ |
| 115 | RpL13A         | Translation, protein binding, bristle morphogenesis | 223   | 15.7 | 10 | ●●●●●●●●●○     |       | $3.7 \cdot 10^{-12}$ |
| 116 | Tsp97E         | Unkown                                              | 125   | 18.9 | 11 | ●●●●●●●●●      |       | $5 \cdot 10^{-12}$   |
| 117 | para           | Transport, ion transport, response to DDT           | 1482  | 17.2 | 9  | ●●●●●●●●●      |       | $5.1 \cdot 10^{-12}$ |
| 118 | CG32048        | Molecular function, biological process              | 2825  | 18.6 | 11 | ●●●●●●○●○      | D,A   | $5.1 \cdot 10^{-12}$ |
| 119 | slik           | ATP binding, cytokinesis, kinase activity           | 604   | 23.0 | 11 | ●●●●●●●○●●     | A     | $5.6 \cdot 10^{-12}$ |
| 120 | CG6043         | Unkown                                              | 198   | 18.8 | 9  | ●○●○●○●○●○●●   | A     | $6.3 \cdot 10^{-12}$ |
| 121 | sm             | RNA binding, axon guidance, mRNA processing         | 928   | 10.9 | 9  | ●●○●○●○●●●●    | D     | $7.5 \cdot 10^{-12}$ |
| 122 | Ank2           | Axon extension, protein binding                     | 29194 | 25.9 | 13 | ●●●●●●●●●●●    | D,A   | $7.7 \cdot 10^{-12}$ |
| 123 | CG14235        | Protein binding, electron transport                 | 2939  | 13.8 | 9  | ●●○●○●○●○●○●○● | A,T   | $9.1 \cdot 10^{-12}$ |
| 124 | CG14235        | Protein binding, electron transport                 | 2939  | 13.8 | 9  | ●●○●○●○●○●○●○● | A,T   | $9.5 \cdot 10^{-12}$ |
| 125 | btsz           | Transport, zinc ion binding, transporter activity   | 551   | 30.8 | 13 | ●●●●●●●●●      | A     | $1 \cdot 10^{-11}$   |
| 126 | Drl-2          | ATP binding, kinase activity, nucleotide binding    | 4170  | 20.8 | 9  | ●●●●●●●○●○     |       | $1.2 \cdot 10^{-11}$ |
| 127 | Prm            | ATP binding, translation, motor activity            | 4175  | 23.1 | 11 | ●●●●●○●●●○     |       | $1.2 \cdot 10^{-11}$ |
| 128 | CG33995        | Unkown                                              | 925   | 13.5 | 9  | ●●●●○●●●○●○●○  | D     | $2.7 \cdot 10^{-11}$ |
| 129 | nudE           | Mitosis, cell cycle, cell division, protein binding | 141   | 13.4 | 9  | ●●●●●○●○●○●○   |       | $2.8 \cdot 10^{-11}$ |
| 130 | Oct $\beta$ 2R | Protein binding, receptor activity                  | 3169  | 13.2 | 9  | ●●●●●●●○●○●○   |       | $2.8 \cdot 10^{-11}$ |
| 131 | fru            | Mating, copulation, DNA binding, transcription      | 276   | 9.8  | 9  | ●●●●●●●○●○     | A     | $3.1 \cdot 10^{-11}$ |
| 132 | eIF-1A         | Engulfment, RNA binding, translation, phagocytosis  | 6438  | 16.9 | 11 | ●●●●●●●○●○●○   |       | $3.4 \cdot 10^{-11}$ |
| 133 | byn            | DNA binding, transcription, DNA-dependent           | 768   | 12.4 | 9  | ●●●●●○●○●●     |       | $3.4 \cdot 10^{-11}$ |
| 134 | fra            | Axon guidance, motor axon guidance                  | 964   | 16.3 | 10 | ●●●●●●●○●○     | A     | $3.6 \cdot 10^{-11}$ |
| 135 | bun            | Oogenesis, segmentation, transcription              | 816   | 15.8 | 9  | ●○●○●○●○●○●●   | IR    | $4.7 \cdot 10^{-11}$ |
| 136 | CG9850         | Proteolysis, protein binding, zinc ion binding      | 688   | 14.7 | 9  | ●●○●○●○●○●○●   | A     | $4.8 \cdot 10^{-11}$ |
| 137 | CG4467         | Proteolysis, zinc ion binding, hydrolase activity   | 8369  | 20.2 | 11 | ●●●●○●●●○      |       | $5.7 \cdot 10^{-11}$ |
| 138 | Syb            | Lumen formation, open tracheal system               | 710   | 18.1 | 9  | ●●●●●●●○●○     | A     | $7.7 \cdot 10^{-11}$ |
| 139 | Fmr1           | Embryonic, chemotaxis, locomotion, phototaxis       | 1222  | 14.5 | 9  | ●●●●●○●○●○●○   |       | $8.3 \cdot 10^{-11}$ |
| 140 | qkr54B         | RNA binding                                         | 82    | 14.6 | 10 | ●●●●●●○●○      |       | $1 \cdot 10^{-10}$   |
| 141 | CG14235        | Protein binding, electron transport                 | 2939  | 13.8 | 9  | ●●●●○●●●       | A,T   | $1.1 \cdot 10^{-10}$ |
| 142 | CG5484         | Protein binding                                     | 196   | 16.2 | 9  | ●●●●○●○●○●○●●  | D     | $1.1 \cdot 10^{-10}$ |
| 143 | Tm1            | Oogenesis, actin binding, protein binding           | 1936  | 18.8 | 11 | ●●●●●●●○●○●○   | ES,D  | $1.2 \cdot 10^{-10}$ |
| 144 | nkd            | Protein binding, zinc ion binding                   | 343   | 13.4 | 10 | ●●●●●●●○●○     |       | $1.2 \cdot 10^{-10}$ |
| 145 | beat-IIIb      | Unkown                                              | 1486  | 19.3 | 9  | ●●●●○●○●○●○●●  |       | $1.2 \cdot 10^{-10}$ |
| 146 | CG6206         | Protein binding, metabolic process                  | 230   | 21.7 | 10 | ●●●●●●●●○●○    | ES,D  | $1.5 \cdot 10^{-10}$ |
| 147 | CG12063        | Unkown                                              | 394   | 22.8 | 11 | ●●●●○●○●○●○●●  |       | $1.5 \cdot 10^{-10}$ |
| 148 | CycG           | Unkown                                              | 6952  | 16.3 | 11 | ●●●●●●●●●●     | D,A   | $1.6 \cdot 10^{-10}$ |
| 149 | CG8408         | Molecular function, biological process              | 1061  | 31.2 | 16 | ●●●●●●●●○●○    |       | $2.2 \cdot 10^{-10}$ |
| 150 | Pka-R1         | CAMP binding, molting cycle, protein binding        | 1003  | 13.2 | 10 | ●●●●●○●○●●     | D,A   | $2.3 \cdot 10^{-10}$ |
| 151 | CG11206        | Cell surface receptor linked signal transduction    | 467   | 12.4 | 9  | ●●●●●●●○●○●○   |       | $3.3 \cdot 10^{-10}$ |
| 152 | sif            | Protein binding, hydrolase activity                 | 851   | 11.4 | 9  | ●●●●●●●○●○     |       | $3.7 \cdot 10^{-10}$ |
| 153 | tw5            | Protein binding, mitotic anaphase                   | 149   | 28.3 | 14 | ●●●●●●●●●○     | D,A   | $3.8 \cdot 10^{-10}$ |
| 154 | esn            | Zinc ion binding, metal ion binding                 | 4134  | 12.4 | 9  | ●●●●●●●●○      |       | $3.8 \cdot 10^{-10}$ |
| 155 | Pkn            | ATP binding, dorsal closure, kinase activity        | 1534  | 17.0 | 9  | ●●●●○●○●○●○    | D     | $4 \cdot 10^{-10}$   |
| 156 | CG4467         | Proteolysis, zinc ion binding, hydrolase activity   | 2155  | 19.6 | 9  | ●●●●○●○●●      | D,A   | $4.4 \cdot 10^{-10}$ |
| 157 | CG5484         | Protein binding                                     | 196   | 16.2 | 9  | ●●●●○●○●○●●    | D     | $5.6 \cdot 10^{-10}$ |

Supplementary Table 1: (continued)

|     |                |                                                     |       |      |    |              |      |                      |
|-----|----------------|-----------------------------------------------------|-------|------|----|--------------|------|----------------------|
| 158 | shot           | Axonogenesis, branch fusion, actin binding          | 4337  | 23.1 | 12 | ●●●●●●○○○○●  | D,A  | $5.6 \cdot 10^{-10}$ |
| 159 | Moca-cyp       | Protein folding, isomerase activity                 | 446   | 13.7 | 10 | ●●○○●●●○○○○  | A    | $5.7 \cdot 10^{-10}$ |
| 160 | CG31048        | GTP binding, GTPase binding                         | 19    | 19.2 | 9  | ●●●●●●●●●●   |      | $6.4 \cdot 10^{-10}$ |
| 161 | Antp           | Thorax, DNA binding, antennal segment               | 9715  | 17.1 | 11 | ●●○○○●○○○●●  | D,T  | $7.9 \cdot 10^{-10}$ |
| 162 | CG16953        | Unkown                                              | 64    | 16.3 | 9  | ●●●●●●●○○●   |      | $8.7 \cdot 10^{-10}$ |
| 163 | Vha68-2        | Transport, ATP binding, ion transport               | 695   | 23.1 | 11 | ●●●●●●●○○○   | D    | $1 \cdot 10^{-9}$    |
| 164 | CG31140        | Phosphorylation, zinc ion binding                   | 648   | 16.0 | 9  | ●●●●●●●●●    | D    | $1 \cdot 10^{-9}$    |
| 165 | CG30271        | Unkown                                              | 316   | 15.5 | 9  | ●●●●●●○○○○●  |      | $1.1 \cdot 10^{-9}$  |
| 166 | CG1674         | Protein binding                                     | 83    | 17.1 | 10 | ●●●●●●●●●●   | D,A  | $1.1 \cdot 10^{-9}$  |
| 167 | Trl            | Mitosis, oogenesis, cell cycle, DNA binding         | 15    | 30.5 | 14 | ●●●●●●●●●○   | D    | $1.4 \cdot 10^{-9}$  |
| 168 | CG5484         | Protein binding                                     | 196   | 16.2 | 9  | ●●●●●○○○○●●  |      | $1.4 \cdot 10^{-9}$  |
| 169 | CG31145        | Protein binding                                     | 493   | 24.8 | 15 | ●●●●●●●○○○   |      | $2.1 \cdot 10^{-9}$  |
| 170 | Akap200        | Autophagic cell death, type I hypersensitivity      | 2020  | 27.3 | 17 | ●●●●●●●      | ES,D | $2.2 \cdot 10^{-9}$  |
| 171 | Glu-RIB        | Transport, ion transport, receptor activity         | 7192  | 12.5 | 9  | ●●●●○○●○○○   |      | $2.5 \cdot 10^{-9}$  |
| 172 | Caki           | ATP binding, cell adhesion, protein binding         | 658   | 31.2 | 15 | ●●●●●●●●●●   | D,A  | $4 \cdot 10^{-9}$    |
| 173 | CG17274        | Transport, ion transport, receptor activity         | 16    | 14.8 | 9  | ●●●●●○○●●○○  |      | $4.7 \cdot 10^{-9}$  |
| 174 | htt            | Binding                                             | 846   | 14.1 | 9  | ●●●●●●●○○○○  |      | $6.7 \cdot 10^{-9}$  |
| 175 | cbt            | Dorsal closure, zinc ion binding                    | 1060  | 18.3 | 10 | ●●●●●●●●○○   |      | $7 \cdot 10^{-9}$    |
| 176 | CG30118        | Unkown                                              | 108   | 13.5 | 9  | ●●●●●○○●○○○○ |      | $8.1 \cdot 10^{-9}$  |
| 177 | CG12424        | Unkown                                              | 7231  | 15.6 | 11 | ●●●●●●●○○○   | D    | $1.1 \cdot 10^{-8}$  |
| 178 | CG32352        | Protein binding                                     | 89    | 15.6 | 9  | ●●●●●●●○○○   |      | $1.3 \cdot 10^{-8}$  |
| 179 | CG3632         | Zinc ion binding, dephosphorylation                 | 268   | 13.5 | 9  | ●●●●●●●●●●   | D,A  | $2.3 \cdot 10^{-8}$  |
| 180 | CG33298        | Transport, ATP binding, ATPase activity             | 78    | 21.2 | 16 | ●●●●●●●●●●   | D    | $2.3 \cdot 10^{-8}$  |
| 181 | htt            | Binding                                             | 298   | 12.5 | 9  | ●●●●●●●○○○   |      | $2.6 \cdot 10^{-8}$  |
| 182 | CG11882        | Protein binding, identical protein binding          | 40    | 16.3 | 9  | ●●●●●○○●○○○○ |      | $2.7 \cdot 10^{-8}$  |
| 183 | ATPCL          | Binding, ATP binding, metabolic process             | 1350  | 13.6 | 9  | ●●●●●○○●○○○○ |      | $2.7 \cdot 10^{-8}$  |
| 184 | CG34371        | Unkown                                              | 11775 | 13.2 | 9  | ●●●●●○○○○●○  |      | $3 \cdot 10^{-8}$    |
| 185 | CG3638         | Transport, engulfment, phagocytosis, ion transport  | 20    | 20.8 | 10 | ●●○○●●●●●●●  | IR   | $3.2 \cdot 10^{-8}$  |
| 186 | AGO1           | MRNA cleavage, miRNA binding, synaptogenesis        | 426   | 14.3 | 9  | ●●●●●●●●●●   |      | $3.3 \cdot 10^{-8}$  |
| 187 | jim            | Zinc ion binding, nucleic acid binding              | 337   | 13.1 | 9  | ●●●●●●●○○○○  |      | $3.4 \cdot 10^{-8}$  |
| 188 | CG6686         | Protein binding                                     | 53    | 15.9 | 9  | ●●○○●●●○○●●  | A    | $3.5 \cdot 10^{-8}$  |
| 189 | CG11265        | Transferase activity, sister chromatid cohesion     | 74    | 18.5 | 9  | ●●●●●○○●●●●  |      | $3.7 \cdot 10^{-8}$  |
| 190 | Mbs            | Oogenesis, dorsal closure, protein binding          | 706   | 26.9 | 12 | ●●●●●●●●●●   | A    | $1.1 \cdot 10^{-7}$  |
| 191 | CG12029        | Protein binding, zinc ion binding                   | 491   | 23.6 | 13 | ●●●●●●●●○○   |      | $1.2 \cdot 10^{-7}$  |
| 192 | Gug            | DNA binding, eye development, hydrolase activity    | 332   | 19.9 | 13 | ●●●●●●●●●●   | D    | $1.6 \cdot 10^{-7}$  |
| 193 | up             | Myofibril assembly, muscle maintenance              | 1881  | 14.7 | 10 | ●●●●●●●●●●   | D,A  | $3.1 \cdot 10^{-7}$  |
| 194 | CG12814        | Unkown                                              | 8894  | 16.3 | 9  | ●●●●●○○●○○○○ |      | $6.7 \cdot 10^{-7}$  |
| 195 | par-1          | ATP binding, protein binding, kinase activity       | 2104  | 13.8 | 10 | ●●●●●●●○○○○  | A    | $1.7 \cdot 10^{-6}$  |
| 196 | sls            | Mitosis, cell cycle, locomotion, actin binding      | 53    | 18.1 | 11 | ●●●●●○○○●●●● |      | $3.3 \cdot 10^{-6}$  |
| 197 | seq            | Axonogenesis, dendrite development                  | 1398  | 12.4 | 9  | ●●●●●●●○○○○  | A    | $5.2 \cdot 10^{-6}$  |
| 198 | CG31302        | Motor activity, ciliary or flagellar motility       | 2726  | 12.2 | 9  | ●●●●●○○●○○○○ |      | $5.8 \cdot 10^{-6}$  |
| 199 | GluCl $\alpha$ | Transport, ion transport, receptor activity         | 708   | 11.3 | 9  | ●●●●●●○○●●   | A    | $3.5 \cdot 10^{-5}$  |
| 200 | CG30183        | Protein binding                                     | 75    | 18.4 | 11 | ●●●●●●●○○○○  |      | $2.8 \cdot 10^{-4}$  |
| 201 | VhaSFD         | Binding, transport, ATP binding, ion transport      | 25    | 11.3 | 9  | ●●●●●●●●●●   |      | $4 \cdot 10^{-4}$    |
| 202 | CG3999         | Lyase activity, protein binding, catalytic activity | 36    | 13.8 | 9  | ●●●●●●●○○○   |      | $6.4 \cdot 10^{-4}$  |
