# Supplementary material for: Modulation of alternative splicing by long-range RNA structures in Drosophila
Source: PubMed Central journal article supplement — Nucleic Acids Res. 2009 May 22;37(14):4533–44. doi: 10.1093/nar/gkp407 (PMC2724269; doi:10.1093/nar/gkp407), 2009-05-22
Supplement: gkp407_2.pdf [file gkp407_2.pdf]

Supplementary Table 2:

| #  | Chr   | ± | Pos. 1   | Pos. 2   | ε | Box 1             | Box 2             |
|----|-------|---|----------|----------|---|-------------------|-------------------|
| 1  | chr3R | + | 24959215 | 24960667 | 0 | AAACTAAACTC       | GAGTTTAGTTT       |
| 2  | chr3R | - | 27043447 | 27042905 | 0 | TGTATTGGTTT       | GAACCAATACA       |
| 3  | chr3R | - | 18981470 | 18980780 | 0 | TCCACAACCAG       | TTGGTTGTGGA       |
| 4  | chr3R | + | 7026333  | 7030199  | 0 | CACTTGCAAAGTGC    | GCATTTTGCAAGTG    |
| 5  | chrX  | - | 8536408  | 8534640  | 0 | AATGTGCTGAAAGTTT  | GAACTTTCAGCACATT  |
| 6  | chr2R | + | 12000497 | 12002198 | 0 | TTGAACGGTTA       | TAACCGTTCAA       |
| 7  | chr3R | + | 16983502 | 16999482 | 0 | CTTTTGTGT         | ACACAAAGG         |
| 8  | chr2R | - | 6419485  | 6371880  | 0 | ATGAAAAAGCAA      | TTGCTTTTTTCAT     |
| 9  | chr3L | - | 14746367 | 14744966 | 0 | GAGGCGACA         | TGTCGTCCCTC       |
| 10 | chr2L | + | 873612   | 874922   | 0 | TTTTGCTTTTGT      | AGCAAAAGCAAAA     |
| 11 | chr3L | - | 2156582  | 2154837  | 0 | GGTGCGTGAGTGC     | GCACTCACGCACT     |
| 12 | chr2R | - | 3213547  | 3212340  | 0 | TTATTTCTGTTTT     | AAAACAGAAGTAA     |
| 13 | chr3L | + | 7008415  | 7012637  | 0 | TACACAAAATGGTTTGG | CCAAACCATTGTGTGTG |
| 14 | chr3R | + | 20772084 | 20772486 | 0 | GATACGTACATGA     | TCAGTGTGGTGATC    |
| 15 | chrX  | - | 8536408  | 8534640  | 0 | AATGTGCTGAAAGTTT  | GAACTTTCAGCACATT  |
| 16 | chr3L | - | 18790541 | 18757100 | 0 | CTGTTGTTGCTG      | CAGCAACAGCAG      |
| 17 | chr2R | - | 21074311 | 21072615 | 0 | GGAACCACC         | GGTGGTTCC         |
| 18 | chr3R | - | 27044616 | 27043733 | 0 | GAGATAAAGT        | ACTTTATCTC        |
| 19 | chr2R | - | 8061528  | 8055772  | 0 | TCGATTTTGTAGTG    | CGCTACAAAATCGA    |
| 20 | chr2L | - | 8252190  | 8245311  | 0 | CTGGTGTTTGAATGGT  | ACCATTCAAACACCAG  |
| 21 | chrX  | + | 1803522  | 1804593  | 0 | GTCCCTGTGTG       | CACACAGGGGC       |
| 22 | chr2R | - | 9077000  | 9072790  | 0 | ACACACATACACATG   | CATGTGTGTATGTGTGT |
| 23 | chr2R | + | 12020629 | 12023427 | 1 | AAGCAGAAGC        | GCTTTTGCTT        |
| 24 | chr2R | - | 10122147 | 10121893 | 0 | ATCTCTCACTTTAAA   | TTTAAAGTGAGAGAT   |
| 25 | chr2L | + | 18385021 | 18387151 | 0 | CAACATCATCATCA    | TGATGATGGTGTG     |
| 26 | chr3L | + | 8594542  | 8594666  | 0 | ACAGCAACAAAT      | ATTTGTTGCTGT      |
| 27 | chrX  | + | 9647368  | 9647515  | 0 | GCGCACAGCG        | CGCTGTGCGC        |
| 28 | chr3L | - | 19903048 | 19881807 | 0 | GTCATGTTCAAG      | CTTGAACATGGC      |
| 29 | chr3R | + | 24939941 | 24940060 | 0 | TATTATCTCATT      | AATGGGATAATA      |
| 30 | chr2R | - | 14324930 | 14320346 | 0 | ATCCGAGCA         | TGTTCCGAT         |
| 31 | chr3R | + | 9583526  | 9584084  | 0 | AGTTTTTGCATT      | AATGCAAAAGACT     |
| 32 | chr2R | - | 18226234 | 18223350 | 0 | TGTGTGTGTGTGTGTG  | CACACACACACACGCA  |
| 33 | chr3R | + | 7203987  | 7217151  | 0 | CAGCATTCA         | TGAATGCTG         |
| 34 | chr3R | - | 23009510 | 23009116 | 0 | TGGCAATTG         | CAATTGTCA         |
| 35 | chr3L | + | 13995511 | 13996151 | 0 | GGAGCGAGACGA      | TCGTCTCGCTCT      |
| 36 | chr2L | - | 743287   | 741049   | 1 | TGGCGACAAG        | TTTGTCCGA         |
| 37 | chr3R | + | 20500661 | 20500794 | 0 | TATGCATACAAATCGGT | ATCGATTTGTATGCATG |
| 38 | chr2L | - | 6800627  | 6800368  | 0 | CTGCTGTGGC        | GCCACAGCAG        |
| 39 | chr3R | + | 11826594 | 11827392 | 0 | TTGTGTGGAACAA     | TTGTTCCACACGA     |
| 40 | chr2L | + | 9519535  | 9519629  | 0 | TAAAAAGGCACAAAAT  | ATTTTGTGTCTTTTAA  |
| 41 | chrX  | - | 20103119 | 20101743 | 0 | AATAGGAAC         | GTTCCCTGTT        |
| 42 | chr2R | - | 10103358 | 10103308 | 0 | CTCGCAGTATA       | TATACTGTGAG       |
| 43 | chr3L | + | 21828360 | 21829003 | 0 | GTGTGTGTGTTTGGC   | CGCAAGCACACACAC   |
| 44 | chr3R | + | 20532082 | 20532169 | 0 | CTGGCCAGGA        | TCCTGGCCAG        |
| 45 | chr3L | + | 4580256  | 4586443  | 0 | TTGTTGTTGTTG      | CAACAATAACAA      |
| 46 | chr4  | + | 261057   | 261196   | 0 | AAAGGTGATACGTAAG  | TTTACGTATCGCCTTT  |
| 47 | chr3L | - | 2564371  | 2564023  | 1 | AAGAAGGGGC        | GCCCCTTTTT        |
| 48 | chr2R | - | 3212053  | 3211554  | 0 | AATTTCCAAT        | ATTGAAAATT        |
| 49 | chr3L | - | 14750715 | 14750563 | 1 | CGCGTGTGTGT       | ACACACATGCG       |
| 50 | chr2R | + | 6175850  | 6179915  | 1 | CGTTTTTCAG        | CTGAAAATG         |
| 51 | chrX  | - | 20103119 | 20101743 | 0 | AATAGGAAC         | GTTCCCTGTT        |
| 52 | chr3R | + | 15592464 | 15600243 | 0 | CTTTTGTAT         | ATCAAAAAG         |
| 53 | chrX  | - | 20103119 | 20101743 | 0 | AATAGGAAC         | GTTCCCTGTT        |
| 54 | chr3L | - | 1723525  | 1718152  | 0 | CGCCTTGGGT        | ACCCAAGGCG        |
| 55 | chr3L | - | 2090953  | 2087259  | 0 | CCAGAGTTCGA       | TCGAACTCTGG       |
| 56 | chr2R | - | 2625347  | 2613992  | 0 | GTTGCAGTTT        | AAACTGCAGC        |
| 57 | chrX  | + | 7126662  | 7131626  | 1 | GCAGCAGCTG        | CAGCTGCTGC        |

Supplementary Table 2: (continued)

|     |           |   |          |          |   |                  |                  |
|-----|-----------|---|----------|----------|---|------------------|------------------|
| 58  | chr2L     | + | 8655054  | 8655144  | 0 | CAGCAAATGC       | GCATTTGTTG       |
| 59  | chr4      | + | 261057   | 261196   | 0 | AAAGGTGATACGTAAG | TTTACGTATCGCCTTT |
| 60  | chr2L     | - | 250653   | 242863   | 0 | TTGAGCGTATTTT    | AAAATACGCTCAA    |
| 61  | chrUextra | - | 15909332 | 15868644 | 0 | TGGATGTTGT       | ATAACATCCA       |
| 62  | chr3R     | - | 11740417 | 11740319 | 0 | AAGCTATTGA       | TCAATAGTTT       |
| 63  | chr3R     | - | 14080994 | 14079245 | 0 | TTACAAGTGAA      | TTCACCTGTAA      |
| 64  | chr3L     | - | 1668543  | 1668300  | 1 | ATCGATCAGCAA     | TTGCTGATCGAT     |
| 65  | chr2R     | + | 12312204 | 12313150 | 0 | TGTGTGTGT        | ACACACATA        |
| 66  | chr3L     | - | 15500516 | 15499518 | 0 | GCTTATGCAAAC     | GTTTGCATAAGT     |
| 67  | chr3R     | - | 17644543 | 17644283 | 1 | TGCGTTTGTTTTGG   | CAAAACAAGCGCA    |
| 68  | chr2L     | + | 9447078  | 9460432  | 1 | AGAGAGAGA        | TCTCTCTCT        |
| 69  | chr3R     | + | 7048521  | 7048723  | 0 | CACACACACAAAA    | TTTTGTGTGTGTG    |
| 70  | chr2R     | + | 4282194  | 4282418  | 0 | TAACTAAAGTGC     | GCACTTTAGTTA     |
| 71  | chr3R     | - | 272059   | 271231   | 2 | TGGCATCGT        | ACGATGCCA        |
| 72  | chr2L     | - | 6337974  | 6337347  | 0 | ACAACAGCAAT      | ATTGTTGTTGT      |
| 73  | chr2L     | - | 17655592 | 17651558 | 0 | TATGCGACAACAACCT | GAGTTGTTGTTGCATA |
| 74  | chr2L     | + | 17404869 | 17405282 | 1 | ATGTACATTG       | CAATGTACAT       |
| 75  | chr2R     | + | 9714623  | 9717024  | 0 | AGTGA AAAAGTGA   | TCACTTTTTATT     |
| 76  | chr3L     | + | 17427614 | 17429347 | 0 | AACTGCACGCCG     | TGGCGTGCAGTT     |
| 77  | chr2R     | - | 10840548 | 10840181 | 2 | GACTCAGC         | GCTGAGTTC        |
| 78  | chr2L     | - | 13171281 | 13170912 | 0 | ATAATAGTGCGTAGA  | TTTACGCACTGTTAT  |
| 79  | chr2R     | + | 2698734  | 2699308  | 0 | TGTGTGCGTGC      | GCACGCACACA      |
| 80  | chr3R     | - | 20870617 | 20870587 | 1 | CCCATACATA       | TATGTATGGG       |
| 81  | chr2R     | + | 10853574 | 10859143 | 0 | GGTGTGTGTGT      | GCACACACATC      |
| 82  | chrX      | - | 8990751  | 8989726  | 0 | TATGTTGTTGT      | ACAACAACATG      |
| 83  | chr2L     | - | 11798589 | 11797860 | 0 | GCGTCAGCATA      | TGTGCTGACGC      |
| 84  | chr3L     | + | 1331053  | 1331187  | 0 | CGCTGGCAAA       | TTTGCCAGTG       |
| 85  | chr2R     | + | 17088230 | 17098717 | 0 | GTGTGTGTATG      | TATACACACAT      |
| 86  | chr3R     | + | 17011350 | 17028080 | 0 | GAACAGCAAGTACCAG | TTGGTACTTGCTGTTT |
| 87  | chr3L     | + | 8462837  | 8463182  | 0 | TCAATCGTATTTG    | CAGATACGATTGA    |
| 88  | chr2L     | - | 3279210  | 3278660  | 1 | CACATATAC        | GTATATGTG        |
| 89  | chrX      | - | 13306254 | 13305552 | 1 | GCTTCTCCCG       | CGGGAGAAAGC      |
| 90  | chr2L     | + | 21121770 | 21122098 | 0 | TAAACGAATTTTG    | TAAAATTCGTTTA    |
| 91  | chr2L     | + | 21237539 | 21238218 | 0 | TGTATGGGT        | ACCCATACA        |
| 92  | chr3R     | + | 17868137 | 17868513 | 0 | GTAGCAACAACAA    | TTGTTGTTGCTGC    |
| 93  | chr3R     | - | 5594045  | 5593689  | 1 | TACACACATACAT    | GTGTATGTGTGTG    |
| 94  | chr3L     | - | 20229445 | 20228879 | 0 | ACAACAACAA       | TTGTTGTTGT       |
| 95  | chr2R     | + | 19538692 | 19538814 | 2 | AGGCCAAACA       | TGTTTGCCCT       |
| 96  | chr2R     | + | 14638861 | 14639055 | 0 | CTGCAAATGA       | TCATTTGCAG       |
| 97  | chrX      | + | 18801946 | 18802215 | 1 | GCAACAACA        | TGTTGTTGC        |
| 98  | chr2R     | - | 9072223  | 9067713  | 1 | GTTGGTTGT        | ACAACCAAT        |
| 99  | chr2R     | - | 2618948  | 2614002  | 0 | GTCAATCAA        | TTGATTGAC        |
| 100 | chr3L     | - | 5161291  | 5160249  | 1 | TGTTTTTGT        | ACAAAAACA        |
| 101 | chr3R     | - | 2734099  | 2724372  | 0 | GCATACAACAGC     | GTTGTTGTATGC     |
| 102 | chr3L     | - | 5161291  | 5160249  | 1 | TGTTTTTGT        | ACAAAAACA        |
| 103 | chrX      | - | 13493398 | 13491507 | 0 | GTTGGTTTTG       | CAAAACCAAT       |
| 104 | chr2R     | - | 6139384  | 6138791  | 0 | CAGCGCACAAAAGCA  | TGCTTTTGTGCGTTG  |
| 105 | chr3R     | - | 4064413  | 4064117  | 2 | GAAATCGAA        | TTCGATTTT        |
| 106 | chr2L     | + | 7773764  | 7774169  | 0 | TGTAGTTAGT       | GCTAACTACA       |
| 107 | chrX      | - | 7428044  | 7427390  | 0 | AGTCAAGTGC       | GCATTTGACT       |
| 108 | chr3R     | - | 27707408 | 27699892 | 1 | CTCTCTCTCTT      | AAGAGAGAGAG      |
| 109 | chrX      | - | 18006527 | 18001090 | 1 | ATCAAAATC        | GATTTTGAT        |
| 110 | chr2L     | - | 3708848  | 3708716  | 0 | ATTTATGCAGG      | CCTGCATAGAT      |
| 111 | chrX      | + | 3982461  | 3983779  | 0 | CAGACGATGGTCAC   | GTGACCGTCGTCG    |
| 112 | chr2R     | - | 9791220  | 9791135  | 0 | GTGCATTTGGT      | ACCAAGTGCAC      |
| 113 | chrX      | - | 11922392 | 11922214 | 1 | TGTATGTAC        | GTACATGCA        |
| 114 | chr2L     | - | 3362904  | 3361537  | 1 | GCAACAAAG        | TTTTGTTGC        |
| 115 | chr3R     | + | 1450285  | 1450518  | 0 | CAAATGTGTG       | CACACATTTG       |

Supplementary Table 2: (continued)

|     |       |   |          |          |   |                   |                   |
|-----|-------|---|----------|----------|---|-------------------|-------------------|
| 116 | chr3R | - | 22790246 | 22790110 | 1 | AGCAACAACAA       | TTGTTGTTGCT       |
| 117 | chrX  | - | 16394504 | 16393013 | 0 | CACACACAC         | GTGTGTGTG         |
| 118 | chr3L | + | 9576825  | 9579661  | 0 | ATATTTCTGCC       | GGCAGAAATAT       |
| 119 | chr2R | - | 20290031 | 20289416 | 0 | TGCGTGTGTGT       | ACACACACGCA       |
| 120 | chr2L | + | 13274428 | 13274635 | 0 | GGCGCTTTC         | GAAAGCGCC         |
| 121 | chr2R | - | 15517564 | 15516627 | 2 | CAAAACAAA         | TTTGTTTTG         |
| 122 | chr3L | - | 7688390  | 7659183  | 0 | TGATGGGTATCGT     | ACGATACCCATCA     |
| 123 | chrX  | - | 19638244 | 19635296 | 2 | GTAAGCCAA         | TTGGTTTAC         |
| 124 | chrX  | - | 19638244 | 19635296 | 2 | GTAAGCCAA         | TTGGTTTAC         |
| 125 | chr3R | - | 10650675 | 10650111 | 0 | CCAGGGACCGCAA     | TTGCGGTCCTGG      |
| 126 | chr2R | - | 8960020  | 8955841  | 0 | CCCCTCCA          | TGGAGTGGG         |
| 127 | chr3L | - | 8732212  | 8728026  | 0 | GGAAGTAGCCC       | GGGCTACTTCT       |
| 128 | chr2L | + | 5044799  | 5045733  | 0 | GCAAACAGA         | TTTGTTTGC         |
| 129 | chr3L | + | 9892594  | 9892744  | 1 | TTGTTGTTG         | CAACAGCAA         |
| 130 | chr3R | - | 8386080  | 8382902  | 2 | GCTAATTAG         | CTGATTAGC         |
| 131 | chr3R | - | 14258175 | 14257890 | 0 | GGTTTTTTC         | GAAAAAATC         |
| 132 | chr3R | + | 14100884 | 14107333 | 0 | CTCTTTGTTTC       | GAAACAAAGAG       |
| 133 | chr3L | + | 11925562 | 11926339 | 2 | AATTGGCAA         | TTGCTAATT         |
| 134 | chr2R | + | 8445327  | 8446301  | 1 | TCCAGTATTT        | AAATACTGGA        |
| 135 | chr2L | - | 12540431 | 12539606 | 1 | TGTTGTTGG         | CCAACAGCA         |
| 136 | chr2R | - | 19644874 | 19644177 | 2 | TTGTTGTGT         | ACACAACAA         |
| 137 | chr3R | - | 19070913 | 19062533 | 0 | TTGCAATTGCC       | GGCAATTGCAA       |
| 138 | chr2R | - | 6139419  | 6138700  | 2 | GTGGTGGAA         | TTCCGCCAC         |
| 139 | chr3R | - | 5933069  | 5931838  | 0 | TGCAACGAT         | ATTGTTGCA         |
| 140 | chr2R | + | 13360396 | 13360488 | 0 | CAATGCAAT         | ATTTGCATTG        |
| 141 | chrX  | - | 19638244 | 19635296 | 2 | GTAAGCCAA         | TTGGTTTAC         |
| 142 | chr3R | + | 22543755 | 22543960 | 2 | TCAGGCTAC         | GTAGTTGA          |
| 143 | chr3R | + | 11126830 | 11128777 | 0 | CAAAAAGTGGC       | GCCACTTTTTG       |
| 144 | chr3L | - | 19000502 | 19000149 | 0 | GCAAAAACAA        | TTGTTTTTGT        |
| 145 | chr2L | + | 16990484 | 16991979 | 2 | TGGCGACAT         | GTGTCGCCA         |
| 146 | chr2L | + | 10459559 | 10459799 | 0 | GAAAGCCCCT        | AGGGCTTTTC        |
| 147 | chr3R | + | 27330936 | 27331341 | 0 | AACCAGGGATG       | CATCCCTGTT        |
| 148 | chr3R | - | 27434985 | 27428022 | 1 | TGCAAAAAGAG       | TTCTTTTTGCA       |
| 149 | chrX  | - | 17520872 | 17519795 | 0 | ATGTGTGTGTGTGTGT  | ACACACACACACAT    |
| 150 | chr3L | + | 20821442 | 20822455 | 2 | AGACAAACAA        | TTGTTTGTTT        |
| 151 | chr2R | - | 18223060 | 18222584 | 1 | TGAAGCTTT         | AAAGTTTCA         |
| 152 | chr3L | + | 5668439  | 5669299  | 0 | CTTAATTGA         | TCAATTAGG         |
| 153 | chr3R | - | 5959581  | 5959418  | 0 | GTGTGTGTGTGTGT    | GCACACACACAC      |
| 154 | chr2R | + | 3008246  | 3012389  | 0 | AAATTTGCA         | TGCAGATTT         |
| 155 | chr2R | - | 5144886  | 5143343  | 2 | CCTGGTTTG         | CAGACCAGG         |
| 156 | chr3R | - | 19065369 | 19063205 | 1 | CCAGAACCC         | GGGTTCTGG         |
| 157 | chr3R | + | 22543755 | 22543960 | 2 | TCAGGCTAC         | GTAGTTGA          |
| 158 | chr2R | - | 9786904  | 9782555  | 0 | ATCTTTGCGAGG      | CCTCGCAAAGAT      |
| 159 | chr3R | + | 24167317 | 24167773 | 1 | TGTTGTTGTT        | ACAATAACA         |
| 160 | chr3R | + | 24694767 | 24694795 | 0 | GATGGCGGC         | GCTGCCATC         |
| 161 | chr3R | - | 2734099  | 2724373  | 0 | CATACAACAGC       | GTTGTTGTATG       |
| 162 | chr3R | - | 16409560 | 16409487 | 2 | TAGTGGTGG         | CTACCACTA         |
| 163 | chr2L | + | 12974789 | 12975495 | 0 | TGTCAGCTGAC       | GTCAGCTGACA       |
| 164 | chr3R | + | 19803913 | 19804570 | 0 | GACATCGAG         | CTCGATGTT         |
| 165 | chr2R | + | 18706520 | 18706845 | 2 | CGATTTCCA         | TGGAAATCG         |
| 166 | chr2R | + | 6181465  | 6181558  | 0 | CTGAAGCATT        | AATGCTTCAG        |
| 167 | chr3L | - | 14750544 | 14750515 | 0 | TCTCGCTCTCGCGC    | GTGCGAGAGCGGA     |
| 168 | chr3R | + | 22543755 | 22543960 | 2 | TCAGGCTAC         | GTAGCTTGA         |
| 169 | chr3R | - | 19440789 | 19440281 | 0 | GCTTAATGCATTTGT   | GCAAATGCATTAAGC   |
| 170 | chr2L | + | 8428132  | 8430169  | 0 | AAGTACAACAACAACAA | TTGTTGTTGTTGTGCTT |
| 171 | chr3L | + | 9252094  | 9259295  | 2 | CAGATATAT         | ATATATCTG         |
| 172 | chr3R | - | 17634217 | 17633544 | 0 | ACGCACACACGCACA   | TGTGCGTGTGTGTGT   |
| 173 | chr3R | - | 16679064 | 16679039 | 0 | TTTGAGCCA         | TGGTTCAAA         |

Supplementary Table 2: (continued)

|     |       |   |          |          |   |                  |                 |
|-----|-------|---|----------|----------|---|------------------|-----------------|
| 174 | chr3R | + | 24535044 | 24535899 | 0 | ATTGTGCAG        | CTGCATAAT       |
| 175 | chr2L | - | 479391   | 478321   | 0 | TGACCTACAA       | TTGTGGGTCA      |
| 176 | chr2R | - | 14325622 | 14325505 | 1 | ATTGCTTTG        | CAAAGCAAT       |
| 177 | chr2R | + | 10851875 | 10859117 | 0 | TTGCATAATTG      | CAATTATGCAG     |
| 178 | chr3L | + | 8572406  | 8572504  | 0 | GTGTGTGTT        | AACGCACAC       |
| 179 | chrX  | + | 16191303 | 16191580 | 1 | TGCATATAT        | ATATATGCA       |
| 180 | chr2L | + | 9519535  | 9519629  | 0 | TAAAAAGGCACAAAAT | ATTTTGTGTCTTTTA |
| 181 | chr3R | + | 24526743 | 24527050 | 0 | AATGCAAGT        | ATTTGCATT       |
| 182 | chr3R | - | 24973659 | 24973610 | 0 | GACAAAGGA        | TCCTTTGTC       |
| 183 | chr2R | - | 11887186 | 11885827 | 0 | TTGAACTTG        | CAAGTTCAA       |
| 184 | chr2R | - | 19090976 | 19079192 | 1 | GTTTATGCA        | TGCATAAAT       |
| 185 | chrX  | - | 1113708  | 1113678  | 1 | GCGGTGTGGA       | TCCACATCGC      |
| 186 | chr2R | - | 9845353  | 9844918  | 1 | GTTTGTGTG        | CGCACAAAC       |
| 187 | chr3L | - | 22792989 | 22792643 | 1 | AGATACAGA        | TTTGTATCT       |
| 188 | chr2L | - | 11987635 | 11987573 | 1 | CGATTGCCG        | CGGCAATTG       |
| 189 | chrX  | + | 8460178  | 8460261  | 0 | TATGCTGGC        | GCCAGCATG       |
| 190 | chr3L | + | 16045314 | 16046032 | 0 | CGTGCGTGTGCG     | CGCACACGCACG    |
| 191 | chr3L | + | 3645262  | 3645766  | 0 | GTGAAATCTCGCA    | TGCGAGATTTTCAT  |
| 192 | chr3L | + | 8462837  | 8463182  | 0 | TCAATCGTATTTG    | CAGATACGATTGA   |
| 193 | chrX  | - | 13493398 | 13491507 | 0 | GTTGGTTTTG       | CAAACCAAT       |
| 194 | chr3R | - | 6013634  | 6004731  | 0 | TTTCTGGAC        | GTCCAGAAA       |
| 195 | chr2R | + | 15366421 | 15368535 | 0 | AATGGAATAT       | ATATTCCGTT      |
| 196 | chr3L | - | 2076837  | 2076773  | 0 | AGTTGAAATGC      | GCATTTCAACT     |
| 197 | chr2R | - | 9072175  | 9070768  | 1 | CGTATTTGG        | CCAAATATG       |
| 198 | chr3R | + | 11219258 | 11221993 | 0 | TTTCGATTT        | AAATGTGAA       |
| 199 | chr3R | + | 15592464 | 15593181 | 0 | CTTTTGAT         | ATCAAAAAG       |
| 200 | chr2R | - | 19583927 | 19583841 | 0 | AATGAAACCGT      | ACGGTTTCATT     |
| 201 | chr2L | - | 16724841 | 16724807 | 0 | GAAATTGAA        | TTCGATTTT       |
| 202 | chr3R | + | 6077769  | 6077814  | 1 | CGCTGATAA        | TTATCAGTG       |
